# Supplementary material for: Soft templated mesoporous manganese oxide/carbon nanotube composites via interfacial surfactant assembly
Source: Royal Society of Chemistry journal article supplement (doi:10.1039/c3ta15001a), 2014-01-01
Supplement: c3ta15001a.pdf [file c3ta15001a.pdf]

Electronic Supplementary Information (ESI)

**Soft Templated Mesoporous Manganese  
Oxide/Carbon Nanotube Composite via Interfacial  
Surfactant Assembly**

Chang-Wook Lee, Seung-Beom Yoon, Seong-Min Bak, Joah Han,

Kwang-Chul Roh\* and Kwang-Bum Kim\*

\*E-mail: rkc@kicet.re.kr

## Supporting Information

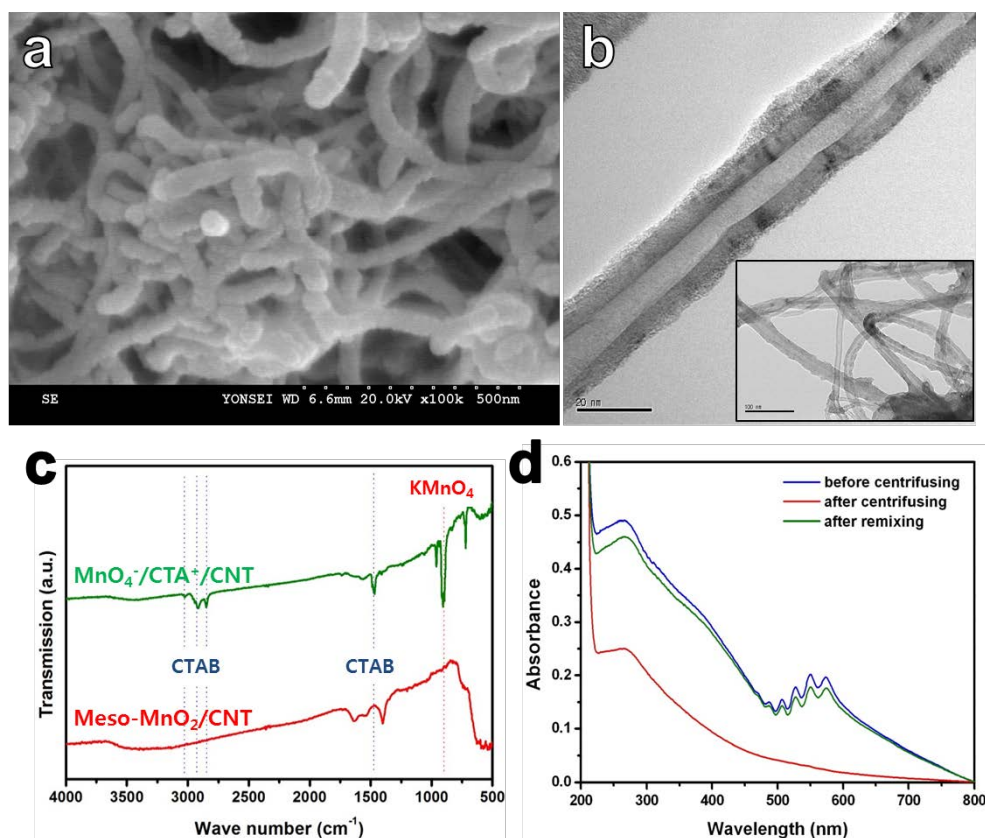

**Fig. S1** (a) SEM and (b) TEM image of  $\text{MnO}_4^-/\text{CTA}^+/\text{CNT}$ ; (c) FT-IR spectra of  $\text{MnO}_4^-/\text{CTA}^+/\text{CNT}$  and the meso- $\text{MnO}_2/\text{CNT}$  composite and (d) UV-vis spectra of the sampled  $\text{MnO}_4^-/\text{CTA}^+/\text{CNT}$  solution.

Fig. S1a and b shows SEM and TEM images of  $\text{MnO}_4^-/\text{CTA}^+/\text{CNT}$ . As shown in SEM and TEM images, the thin coating layer on CNT surface was observed. Therefore, it is clear that the CNTs were uniformly coated with  $\text{MnO}_4^-/\text{CTA}^+$ , while the 3D entangled porous structure of the CNTs was preserved. Fig. S1c shows the FT-IR spectra of  $\text{MnO}_4^-/\text{CTA}^+/\text{CNT}$  and the mesoporous  $\text{MnO}_2/\text{CNT}$  composite. The characteristic signature of methylene ( $-\text{CH}_2$ ) and methyl ( $-\text{CH}_3$ ) C-H stretching vibrations from the surfactant microphase can be seen in the 2700–3100  $\text{cm}^{-1}$  region in the spectrum of the  $\text{MnO}_4^-/\text{CTA}^+/\text{CNT}$ .<sup>1</sup> The strong peak maxima were assigned to the  $-\text{CH}_2$  symmetric and antisymmetric stretching modes; whereas, the

overlapping contributions were assigned to the  $-\text{CH}_3$  symmetric and antisymmetric stretching modes.<sup>1</sup> The peaks around  $750\text{--}800\text{ cm}^{-1}$  were attributed to residual  $\text{KMnO}_4$ .

In contrast, these peaks were noticeably absent in the spectrum of the mesoporous  $\text{MnO}_2/\text{CNT}$  composite. UV-vis spectroscopy was used to observe changes in the concentration of  $\text{MnO}_4^-$  ions in the sampled  $\text{MnO}_4^-/\text{CTA}^+/\text{CNT}$  solution. The sampled solution before centrifuging gave characteristic absorption bands of  $\text{MnO}_4^-$  at wavelengths of 525, 545, and 570 nm. However, these bands were completely absent after centrifuging, indicating that all of the  $\text{MnO}_4^-$  ions assembled with  $\text{CTA}^+/\text{CNT}$ . After remixing the centrifuged solution, the absorbance was recovered, suggesting the restoration of the homogeneous  $\text{MnO}_4^-/\text{CTA}^+/\text{CNT}$  suspension.

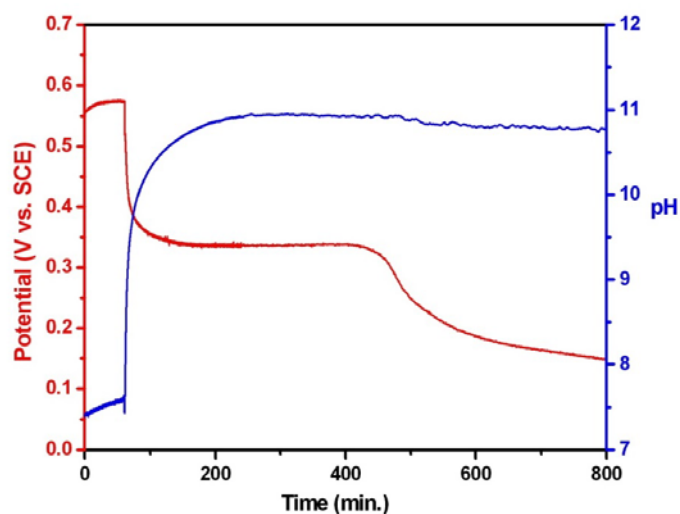

**Fig. S2** Electrode potential (E) and pH vs. time curves of meso- $\text{MnO}_2$  measured during the reduction of  $\text{MnO}_4^-$  ions.

Fig. S2 shows the change in the E and pH of the solution with time during the synthesis of the meso- $\text{MnO}_2$ . The changes in these parameters were very similar to those evident in regions c–f of the meso- $\text{MnO}_2/\text{CNT}$  shown in Fig. 1a.

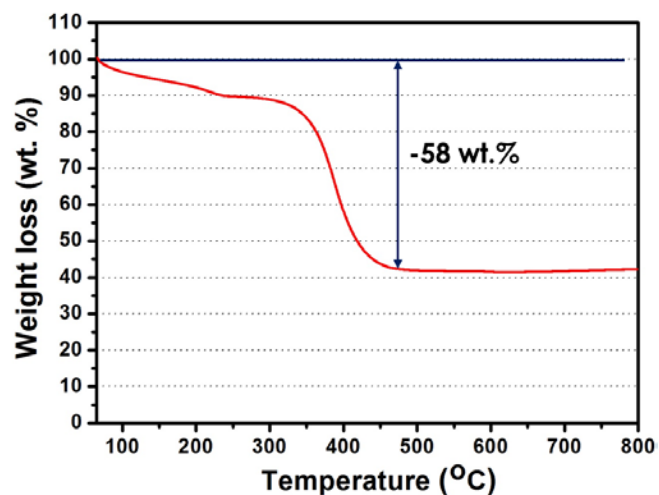

**Fig. S3** TGA plots of meso-MnO<sub>2</sub>/CNT obtained at 10 mL min<sup>-1</sup> air flow and a heating rate of 10°C min<sup>-1</sup>.

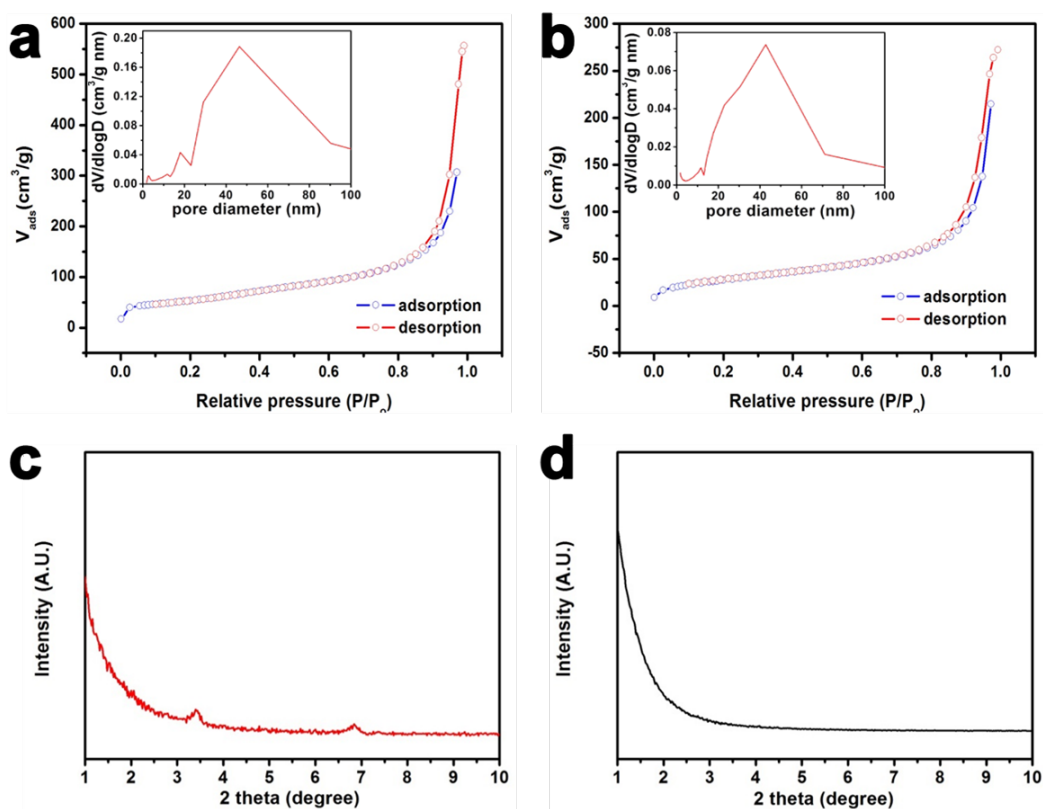

**Fig. S4** N<sub>2</sub> adsorption–desorption isotherms of (a) CNTs, (b) non-porous MnO<sub>2</sub>/CNT and low-angle XRD patterns of (c) meso-MnO<sub>2</sub>/CNT, (d) CNT.

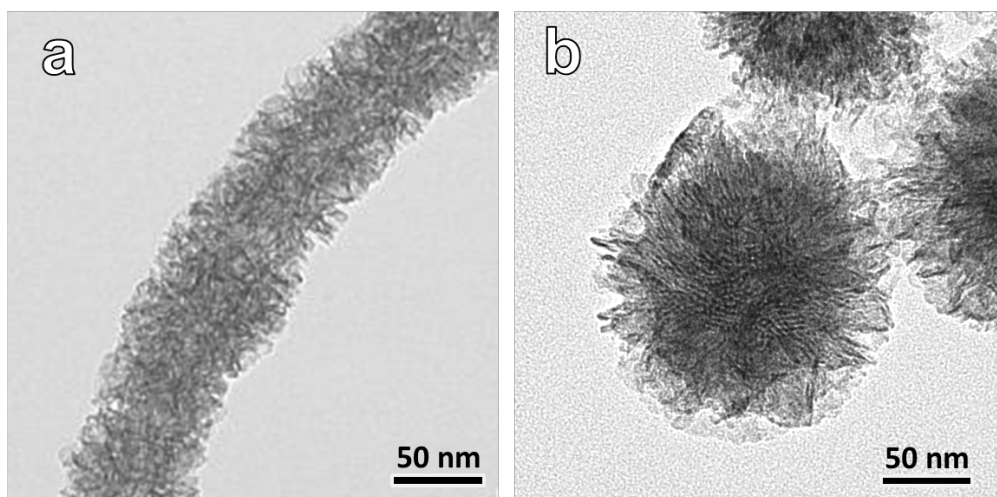

**Fig. S5** TEM images of (a) the meso-MnO<sub>2</sub>/CNT composite and (b) meso-MnO<sub>2</sub> after surfactant removal.

Fig. S5 shows TEM images of the mesoporous MnO<sub>2</sub>/CNT composite and mesoporous MnO<sub>2</sub> after surfactant removal. After surfactant removal, the mesoporous MnO<sub>2</sub>/CNT composite and mesoporous MnO<sub>2</sub> exhibit disordered mesoporous structure caused by partial collapse of the mesoporous domains.

**Table S1.** Specific capacitance values for the meso-MnO<sub>2</sub>/CNT composite and meso-MnO<sub>2</sub> at different scan rates.

|                                                                       | 10 mVs <sup>-1</sup>            | 20 mVs <sup>-1</sup>           | 50 mVs <sup>-1</sup>           | 100 mVs <sup>-1</sup>          | 200 mVs <sup>-1</sup>          | 500 mVs <sup>-1</sup>          | 1000 mVs <sup>-1</sup>         |
|-----------------------------------------------------------------------|---------------------------------|--------------------------------|--------------------------------|--------------------------------|--------------------------------|--------------------------------|--------------------------------|
| <b>Mesoporous MnO<sub>2</sub>/CNT (based on composite mass)</b>       | 220 Fg <sup>-1</sup><br>(100 %) | 213 Fg <sup>-1</sup><br>(97 %) | 201 Fg <sup>-1</sup><br>(91 %) | 188 Fg <sup>-1</sup><br>(85 %) | 170 Fg <sup>-1</sup><br>(77 %) | 139 Fg <sup>-1</sup><br>(63 %) | 112 Fg <sup>-1</sup><br>(51 %) |
| <b>Mesoporous MnO<sub>2</sub>/CNT (based on MnO<sub>2</sub> mass)</b> | 512 Fg <sup>-1</sup><br>(100 %) | 495 Fg <sup>-1</sup><br>(97 %) | 467 Fg <sup>-1</sup><br>(91 %) | 437 Fg <sup>-1</sup><br>(85 %) | 395 Fg <sup>-1</sup><br>(77 %) | 323 Fg <sup>-1</sup><br>(63 %) | 260 Fg <sup>-1</sup><br>(51 %) |
| <b>Mesoporous MnO<sub>2</sub></b>                                     | 125 Fg <sup>-1</sup><br>(100 %) | 105 Fg <sup>-1</sup><br>(84 %) | 83 Fg <sup>-1</sup><br>(67 %)  | 71 Fg <sup>-1</sup><br>(57 %)  | 60 Fg <sup>-1</sup><br>(48 %)  | 48 Fg <sup>-1</sup><br>(39 %)  | 40 Fg <sup>-1</sup><br>(32 %)  |
| <b>CNTs</b>                                                           | 111 Fg <sup>-1</sup><br>(100 %) | 100 Fg <sup>-1</sup><br>(90 %) | 93 Fg <sup>-1</sup><br>(83 %)  | 86 Fg <sup>-1</sup><br>(77 %)  | 77 Fg <sup>-1</sup><br>(69 %)  | 69 Fg <sup>-1</sup><br>(62 %)  | 62 Fg <sup>-1</sup><br>(56 %)  |

## References

1. T. Clark, J. D. Ruiz, H. Y. Fan, C. J. Brinker, B. I. Swanson and A. N. Parikh, *Chemistry of Materials*, 2000, **12**, 3879-3884.
